# Supplementary material for: A mixed-ligand Co(ii) MOF synthesized from a single organic ligand to capture iodine and methyl iodide vapour
Source: Royal Society of Chemistry journal article supplement (doi:10.1039/d3dt01104f), 2023-01-01
Supplement: d3dt01104f1.pdf [file d3dt01104f1.pdf]

## A mixed-ligand Co(II) MOF synthesized from a single organic ligand to capture iodine and methyl iodide vapour

Yilong Lin,<sup>a</sup> Panyu Zeng,<sup>a</sup> Die Wang,<sup>a</sup> Tian-Tian Li,<sup>\*a</sup> Liang-Hua Wu,<sup>b</sup> Sheng-Run Zheng<sup>\*b</sup>

<sup>a</sup>College of Pharmacy, Guizhou University of Traditional Chinese Medicine Guiyang, Guizhou, 550002, P. R. China.

<sup>b</sup>School of Chemistry, South China Normal University, Guangzhou, 510006, P. R. China

\*Corresponding author: Dr. Tian-Tian Li; Prof. Sheng-Run, Zheng

E-mail address: [zhengsr@scnu.edu.cn](mailto:zhengsr@scnu.edu.cn); [525708251@qq.com](mailto:525708251@qq.com)

Tel./Fax.: +86-20-39310187

### Supporting Information

**Table S1** Crystallographic data and structure refinement summary for Co-IPT-IBA

| Complex                          | Co-IPT-IBA                                                                    |
|----------------------------------|-------------------------------------------------------------------------------|
| Empirical formula                | C <sub>20</sub> H <sub>16</sub> N <sub>8</sub> O <sub>4</sub> Co <sub>2</sub> |
| Formula weight                   | 550.27                                                                        |
| Crystal system                   | orthorhombic                                                                  |
| Space group                      | <i>I</i> ba2                                                                  |
| a / Å                            | 25.418(13)                                                                    |
| b / Å                            | 32.433(16)                                                                    |
| c / Å                            | 6.875(4)                                                                      |
| α / °                            | 90                                                                            |
| β / °                            | 90                                                                            |
| γ / °                            | 90                                                                            |
| V / Å <sup>3</sup>               | 5667(5)                                                                       |
| Z                                | 88                                                                            |
| D / g cm <sup>-3</sup>           | 1.290                                                                         |
| μ / mm <sup>-1</sup>             | 1.206                                                                         |
| T / K                            | 293(2)                                                                        |
| R <sup>a</sup> / wR <sup>b</sup> | 0.0504/0.1054                                                                 |
| Total / unique                   | 6373/4331                                                                     |
| R <sub>int</sub>                 | 0.0740                                                                        |

<sup>a</sup>  $R_1 = \frac{\sum ||F_o| - |F_c||}{\sum |F_o|}$ , <sup>b</sup>  $wR_2 = \frac{[\sum w(F_o^2 - F_c^2)^2 / \sum w(F_o^2)^2]}{1/2}$ , where  $w = 1/[\sigma^2(F_o^2) + (aP)_2 + bP]$ .  $P = (F_o^2 + 2F_c^2)/3$ .

\*The refinement results were obtained from squeeze data.

**Table S2** Selected bond lengths [ $\text{\AA}$ ] and angles [ $^\circ$ ] for Co-IPT-IBA

| Co-IPT-IBA          |            |                     |            |
|---------------------|------------|---------------------|------------|
| Co(1)-O3            | 2.023(5)   | Co(1)-O(2)#1        | 2.110(5)   |
| Co(1)-N(5)#2        | 2.027(5)   | Co(1)-N(4)#3        | 2.103(6)   |
| Co(1)-O(2)          | 2.122(5)   | Co(1)-N(8)#4        | 2.1132(5)  |
| Co(2)-O(3)          | 2.070(4)   | Co(2)-N(3)#5        | 2.336(7)   |
| Co(2)-N(6)#2        | 2.398(7)   | Co(2)-N(1)          | 2.068(5)   |
| Co(2)-O(1)          | 2.015(4)   | Co(2)-O(1W)         | 2.120(5)   |
| O(3)-Co(1)-O(3)#1   | 167.56(13) | O(3)-Co(1)-N(5)#2   | 85.77(17)  |
| Co(1)-N(4)#3        | 91.2(2)    | O(3)-Co(1)-O(2)     | 174.80(17) |
| O(3)#1-Co(1)-O(2)   | 83.30(17)  | O(3)-Co(1)-N(8)#4   | 84.9(2)    |
| O(3)#1-Co(1)-N(8)#4 | 106.4(2)   | N(5)#2-Co(1)-O(3)#1 | 91.2(2)    |
| N(5)#2-Co(1)-O(2)   | 83.2(2)    | N(5)#2-Co(1)-N(8)#4 | 92.9(2)    |
| N(4)#3-Co(1)-O(3)#1 | 83.3(2)    | N(4)#3-Co(1)-N(5)#2 | 173.2(3)   |
| N(4)#3-Co(1)-O(2)   | 92.1(2)    | N(4)#3-Co(1)-N(8)#4 | 92.6(2)    |
| O(2)-Co(1)-N(8)#4   | 169.6(2)   | O(3)-Co(2)-N(3)#5   | 84.8(2)    |
| O(3)-Co(2)-N(6)#2   | 93.4(2)    | O(3)-Co(2)-O(1W)    | 88.64(17)  |
| N(3)#5-Co(2)-N(6)#2 | 176.55(19) | N(1)-Co(2)-O(3)     | 177.9(3)   |
| N(1)-Co(2)-N(3)#5   | 93.3(2)    | N(1)-Co(2)-N(6)#2   | 88.5(2)    |
| N(1)-Co(2)-O(1W)    | 90.4(2)    | O(1)-Co(2)-O(3)     | 89.32(17)  |
| O(1)-Co(2)-N(3)#5   | 99.16(19)  | O(1)-Co(2)-N(6)#2   | 83.71(19)  |
| O(1)-Co(2)-N(1)     | 91.76(19)  | O(1)-Co(2)-O(1W)    | 175.1(2)   |
| O(1W)-Co(2)-N(3)#5  | 85.1(2)    | O(1W)-Co(2)-N(6)#2  | 91.9(2)    |

Symmetry transformations used to generate equivalent atoms: #1  $3/2 - x, 1/2 - y, 1/2 + z$ ; #2  $x, 1 - y, 1/2 + z$ ; #3  $3/2 - x, -1/2 + y, z$ ; #4  $-1/2 + x, 1/2 - y, z$ ; #5  $x, 1 - y, -1/2 + z$ .

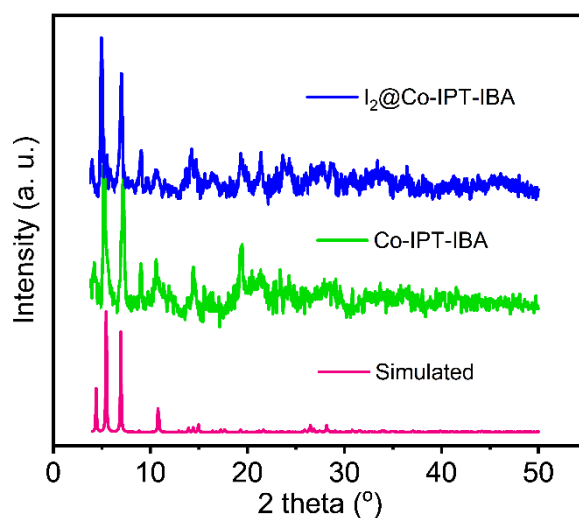**Fig. S1** The PXRD of the simulated, as-synthesized, and activated Co-IPT-IBA.

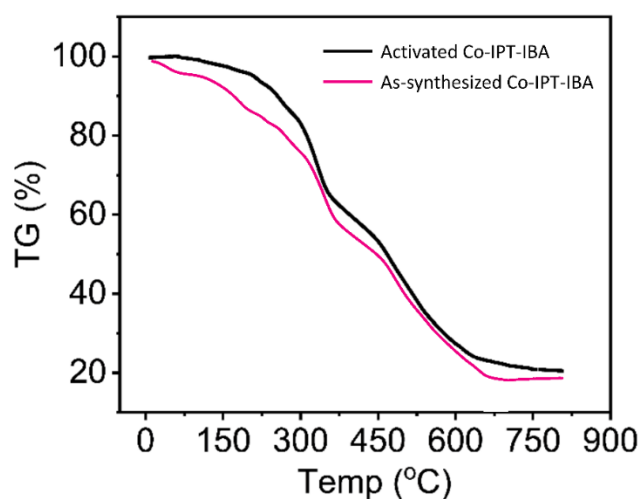

Fig. S2 The TG of the as-synthesized and activated Co-IPT-IBA.

Table S3. Iodine adsorption capacities via vapor diffusion at 75-85 °C in previous literature reports of MOF materials.

| MOFs                       | Iodine uptake (g/g) | Reference |
|----------------------------|---------------------|-----------|
| MIL-53-SH(Al)              | 0.33                | S1        |
| UiO-67                     | 0.53                | S2        |
| UiO-66                     | 0.66                | S3        |
| MOF-867                    | 0.88                | S2        |
| MFM-300(Al)                | 0.94                | S4        |
| Th-UiO-66                  | 0.97                | S5        |
| ZIF-8                      | 1.25                | S6        |
| MFM-300(V <sup>III</sup> ) | 1.42                | S4        |
| NU-100                     | 1.45                | S2        |
| HKUST-1                    | 1.75                | S7        |
| MOF-808                    | 2.18                | S2        |
| Cu-MIL-101                 | 3.42                | S8        |
| MIL-101-ED (5 mmol)        | 4.37                | S9        |
| SCNU-Z7                    | 2.7                 | S10       |
| Co-IPT-IBA                 | 2.88                | This work |

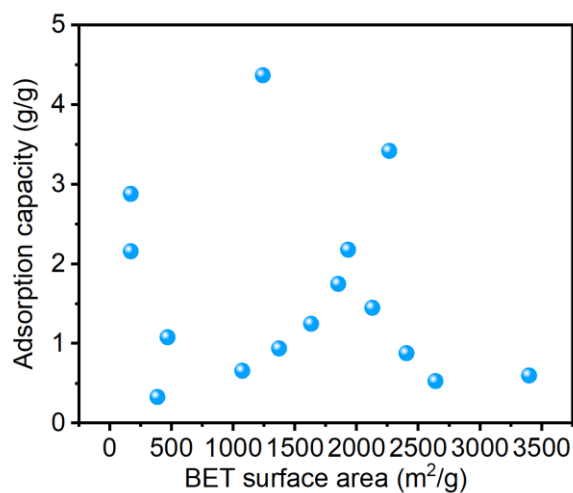

**Fig. S3.** Correlations of I<sub>2</sub> vapor adsorption uptake capacity with BET surface area in MOFs.

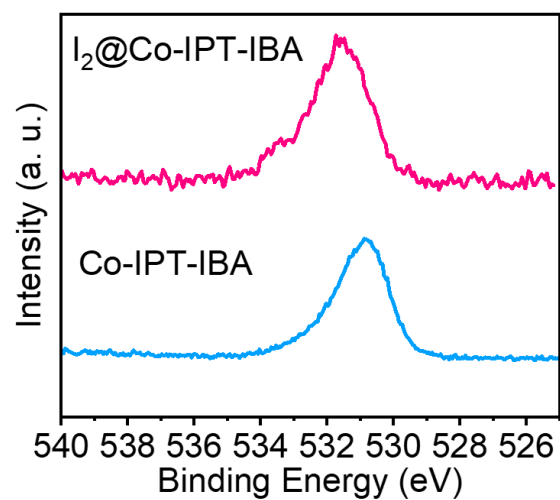

**Fig. S4** The O<sub>1s</sub> XPS of Co-IPT-IBA and I<sub>2</sub>@Co-IPT-IBA.

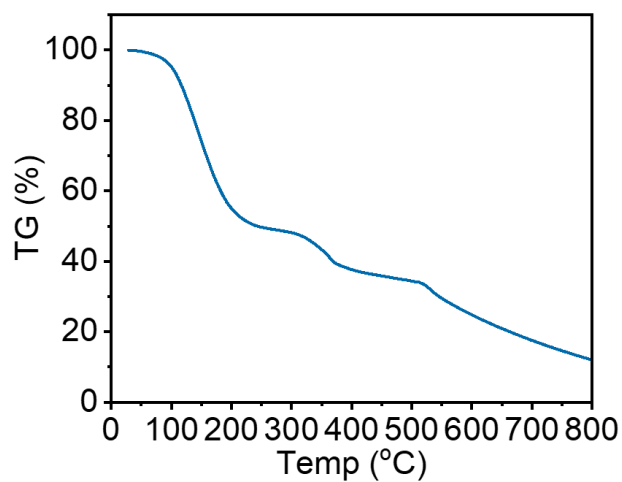

**Fig. S5** The TG curve of I<sub>2</sub>@Co-IPT-IBA.

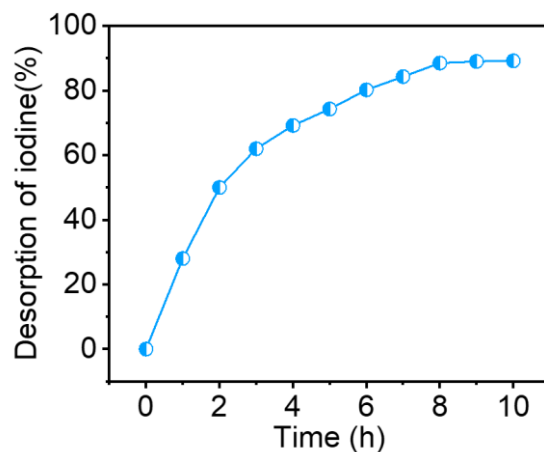

**Fig. S6** The desorption of iodine on I<sub>2</sub>@Co-IPT-IBA.

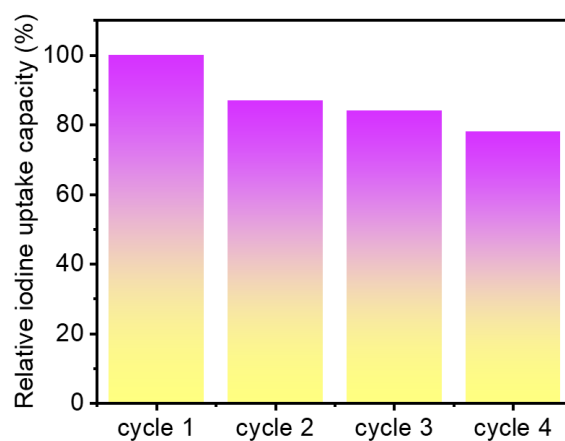

**Fig. S7** Recycling efficiency of Co-IPT-IBA for I<sub>2</sub> vapor adsorption.

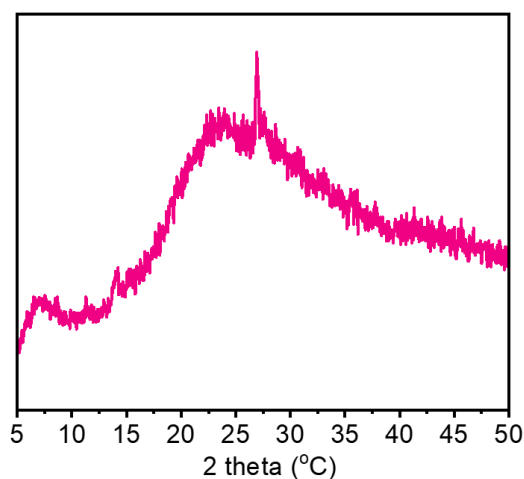

**Fig. S8** The PXRD of CH<sub>3</sub>I@Co-IPT-IBA.

### Reference

S1. A. S. Munn, F. Millange, M. Frigoli, N. Guillou, C. Falaise, V. Stevenson, C. Volkringer, T. Loiseau, G. Cibinf and R. I. Walton, Iodine sequestration by thiol-modified MIL-53(Al), *CrystEngComm*, 2016, **18**, 8108–8114.

- S2. P. Chen, X.-H. He, M.-B. Pang, X.-T. Dong, S. Zhao and W. Zhang, Iodine Capture Using Zr-Based Metal–Organic Frameworks (Zr-MOFs): Adsorption Performance and Mechanism, *ACS Appl. Mater. Inter.*, 2020, **12**, 20429–20439.
- S3. J. Maddock, X.-C. Kang, L.-F. Liu, B.-X. Han, S.-H. Yang and M. Schröder, The Impact of Structural Defects on Iodine Adsorption in UiO-66, *Chemistry*, 2021, **3**, 525–531.
- S4. X.-R. Zhang, I. da Silva, H. G. W. Godfrey, S. K. Callear, S. A. Sapchenko, Y. Q. Cheng, I. Vitórica-Yrezábal, M. D. Frogley, G. Cinque, C. C. Tang, C. Giacobbe, C. Dejoie, S. Rudić, A. J. Ramirez-Cuesta, M. A. Denecke, S.-H. Yang and M. Schröder, Confinement of Iodine Molecules into Triple-Helical Chains within Robust Metal–Organic Frameworks, *J. Am. Chem. Soc.*, 2017, **139**, 16289–16296.
- S5. Z.-J. Li, Y. Ju, H.-J. Lu, X.-L. Wu, X.-L. Yu, Y.-X. Li, X.-W. Wu, Z.-H. Zhang, J. Lin, Y. Qian, M.-Y. He and J.-Q. Wang, Boosting the Iodine Adsorption and Radioresistance of Th-UiO-66 MOFs via Aromatic Substitution, *Chem. Eur. J.*, 2021, **18**, 1286–1291.
- S6. T. D. Bennett, P. J. Saines, D. A. Keen, J.-C. Tan and A. K. Cheetham, Ball-Milling-Induced Amorphization of Zeolitic Imidazolate Frameworks (ZIFs) for the Irreversible Trapping of Iodine, *Chem. Eur. J.*, 2013, **19**, 7049–7055.
- S7. D. F. Sava, K. W. Chapman, M. A. Rodriguez, J. A. Greathouse, P. S. Crozier, H.-Y. Zhao, P. J. Chupas and T. M. Nenoff, Competitive I<sub>2</sub> Sorption by Cu-BTC from Humid Gas Streams, *Chem. Mater.*, 2020, **238**, 116488.
- S8. B.-B. Qia, Y. Liu, T. Zheng, Q.-H. Gao, X.-W. Yan, Y. Jiao and Y. Yang, Highly efficient capture of iodine by Cu/MIL-101, *J. Solid State Chem.*, 2018, **258**, 49–55.
- S9. P. Tang, X.-X. Xie, Z.-Y. Huang, X.-T. Cai, W.-G. Zhang, S.-L. Cai, J. Fan and S.-R. Zheng, Ethylenediamine grafted MIL-101 for iodine vapor capture with high capacity, *J. Solid State Chem.*, 2022, **315**, 123453.
- S10. J. Y. Xian, X. X. Xie, Z. Y. Huang, Y. L. Liu, H. Y. Song, Z. Q. Chen, Y. C. Ou and Sheng-Run Zheng, Structure and Properties of a Mixed-Ligand Co-MOF That Was Synthesized in Situ from a Single Imidazole-Pyridyl-Tetrazole Trifunctional Ligand, *Cryst. Growth Des.*, 2023, **23**, 1448–1454.
